# Supplementary material for: When can physical distancing be relaxed?&nbsp;A health production function approach for COVID-19 control policy
Source: Research Square preprint supplement (doi:10.21203/rs.3.rs-87332/v1), 2020-10-06
Supplement: Supplementary file 1 [file 2c598a8ce1d9e19090d9506a.xlsx]

## Sheet: GermanyCovid
GERMANY - COVID-19
Date	No. of days	Cumulative	Daily	AY = Y/t	Exponential Moving Average (EMA) of			Estimations based on EMA				BAYESIAN, POLICY TARGET W/OUT A TREND					BAYESIAN, POLICY TARGET W/ A TREND
	t	Y(t)	MY = I(t)		Cumulative	Daily	AY = Y/t	Point Elasticity	Arc Elasticity	I(t+1)-I(t)			B (Et>1)	Et<=1	sum			B (Et>1)	Et<=1	sum
					Y(t)	MY = I(t)
												A (I(t+1)<=500)	0	26	26		A (I(t+1)-I(t)<=0, I(t+1)<=500)	0	18	18
2020-02-24	1	16	16	16								NonA	17	44	61		NonA	17	52	69
2020-02-25	2	18	2	9								sum	17	70	87		sum	17	70	87
2020-02-26	3	21	3	7
2020-02-27	4	26	5	6.5								P(A)		0.298851			P(A)		0.206897
2020-02-28	5	53	27	10.6	26.8	10.6	9.82	1.07943				P(B)		0.195402			P(B)		0.195402
2020-02-29	6	66	13	11	39.8667	11.4	10.2133	1.11619	2.156	0.8		P(B|A)		0			P(B|A)		0
2020-03-01	7	117	51	16.7143	65.5778	24.6	12.3803	1.98702	3.16986	13.2
2020-03-02	8	151	34	18.875	94.0519	27.7333	14.5452	1.9067	2.67564	3.13333		P(A|B)		0			P(A|B)		0
2020-03-03	9	188	37	20.8889	125.368	30.8222	16.6598	1.8501	2.42628	3.08889		P(A|B)		0			P(A|B)		0
2020-03-04	10	240	52	24	163.579	37.8815	19.1065	1.98265	2.51259	7.05926
2020-03-05	11	349	109	31.7273	225.386	61.5877	23.3134	2.64172	3.33694	23.7062
2020-03-06	12	534	185	44.5	328.257	102.725	30.3756	3.38183	4.27359	41.1374			B (Et<=1)	Et>1	sum			B (Et<=1)	Et>1	sum
2020-03-07	13	684	150	52.6154	446.838	118.483	37.7889	3.1354	3.82472	15.7583
2020-03-08	14	847	163	60.5	580.225	133.322	45.3593	2.93925	3.50656	14.8389		A (I(t+1)<=500)	26	0	26		A (I(t+1)-I(t)<=0, I(t+1)<=500)	18	0	18
2020-03-09	15	1112	265	74.1333	757.484	177.215	54.9506	3.22498	3.84275	43.8926		NonA	44	17	61		NonA	52	17	69
2020-03-10	16	1296	184	81	936.989	179.477	63.6337	2.82046	3.28401	2.26172		sum	70	17	87		sum	70	17	87
2020-03-11	17	1567	271	92.1765	1146.99	209.984	73.148	2.87068	3.32542	30.5078
2020-03-12	18	2369	802	131.611	1554.33	407.323	92.6357	4.39704	5.2777	197.339		P(A)		0.298851			P(A)		0.206897
2020-03-13	19	3062	693	161.158	2056.89	502.549	115.476	4.35196	5.14913	95.2257		P(B)		0.804598			P(B)		0.804598
2020-03-14	20	3795	733	189.75	2636.26	579.366	140.234	4.13141	4.81457	76.8171		P(B|A)		1			P(B|A)		1
2020-03-15	21	4838	1043	230.381	3370.17	733.91	170.283	4.30994	5.00971	154.545
2020-03-16	22	6012	1174	273.273	4250.78	880.607	204.613	4.30377	4.9687	146.697		P(A|B)		0.371429			P(A|B)		0.257143
2020-03-17	23	7156	1144	311.13	5219.19	968.405	240.119	4.03302	4.60174	87.7977		P(A|B)		0.371429			P(A|B)		0.257143
2020-03-18	24	8198	1042	341.583	6212.12	992.936	273.94	3.62464	4.08248	24.5318
2020-03-19	25	10999	2801	439.96	7807.75	1595.62	329.28	4.84579	5.57677	602.688
2020-03-20	26	13957	2958	536.808	9857.5	2049.75	398.456	5.14423	5.91768	454.125			B (Et<= 0.5)	Et>0.5	sum			B (Et<=0.5)	Et>0.5	sum
2020-03-21	27	16662	2705	617.111	12125.7	2268.17	471.341	4.81216	5.4684	218.417
2020-03-22	28	18610	1948	664.643	14287.1	2161.44	535.775	4.03424	4.50083	-106.722		A (I(t+1)<=500)	26	0	26		A (I(t+1)-I(t)<=0, I(t+1)<=500)	18	0	18
2020-03-23	29	22672	4062	781.793	17082.1	2794.96	617.781	4.5242	5.07864	633.519		NonA	30	31	61		NonA	38	31	69
2020-03-24	30	27436	4764	914.533	20533.4	3451.31	716.698	4.81557	5.41339	656.346		sum	56	31	87		sum	56	31	87
2020-03-25	31	31554	4118	1017.87	24206.9	3673.54	817.089	4.49588	5.00859	222.23
2020-03-26	32	36508	4954	1140.88	28307.3	4100.36	925.018	4.43274	4.9191	426.82		P(A)		0.298851			P(A)		0.206897
2020-03-27	33	42288	5780	1281.45	32967.5	4660.24	1043.83	4.46456	4.94356	559.88		P(B)		0.643678			P(B)		0.643678
2020-03-28	34	48582	6294	1428.88	38172.3	5204.83	1172.18	4.44029	4.90194	544.587		P(B|A)		1			P(B|A)		1
2020-03-29	35	52547	3965	1501.34	42963.9	4791.55	1281.9	3.73785	4.07484	-413.275
2020-03-30	36	57298	4751	1591.61	47741.9	4778.03	1385.14	3.4495	3.74001	-13.517		P(A|B)		0.464286			P(A|B)		0.321429
2020-03-31	37	61913	4615	1673.32	52465.6	4723.69	1481.2	3.1891	3.44115	-54.3446		P(A|B)		0.464286			P(A|B)		0.321429
2020-04-01	38	67366	5453	1772.79	57432.4	4966.79	1578.4	3.14673	3.38959	243.104
2020-04-02	39	73522	6156	1885.18	62795.6	5363.2	1680.66	3.19113	3.43486	396.402
2020-04-03	40	79696	6174	1992.4	68429.1	5633.46	1784.57	3.15676	3.39146	270.268			B (Et<= 0.20)	Et>0.20	sum			B (Et<=0.2)	Et>0.2	sum
2020-04-04	41	85778	6082	2092.15	74212	5782.98	1887.1	3.06448	3.28391	149.512
2020-04-05	42	91714	5936	2183.67	80046	5833.98	1985.95	2.93762	3.13903	51.0081		A (I(t+1)<=500)	9	17	26		A (I(t+1)-I(t)<=0, I(t+1)<=500)	3	15	18
2020-04-06	43	95391	3677	2218.4	85161	5114.99	2063.43	2.47887	2.63169	-718.995		NonA	0	61	61		NonA	6	63	69
2020-04-07	44	99225	3834	2255.11	89849	4687.99	2127.33	2.2037	2.33047	-426.996		sum	9	78	87		sum	9	78	87
2020-04-08	45	103228	4003	2293.96	94308.7	4459.66	2182.87	2.04303	2.15527	-228.331
2020-04-09	46	108202	4974	2352.22	98939.8	4631.11	2239.32	2.06809	2.18077	171.446		P(A)		0.298851			P(A)		0.206897
2020-04-10	47	113525	5323	2415.43	103802	4861.74	2298.02	2.11562	2.23014	230.631		P(B)		0.103448			P(B)		0.103448
2020-04-11	48	117658	4133	2451.21	108420	4618.83	2349.08	1.96622	2.06759	-242.913		P(B|A)		0.346154			P(B|A)		0.166667
2020-04-12	49	120479	2821	2458.76	112440	4019.55	2385.64	1.68489	1.76535	-599.275
2020-04-13	50	123016	2537	2460.32	115965	3525.37	2410.53	1.46248	1.52804	-494.183		P(A|B)		1			P(A|B)		0.333333
2020-04-14	51	125098	2082	2452.9	119010	3044.24	2424.66	1.25554	1.30852	-481.122		P(A|B)		1			P(A|B)		0.333333
2020-04-15	52	127584	2486	2453.54	121868	2858.16	2434.28	1.17413	1.22216	-186.082
2020-04-16	53	130450	2866	2461.32	124728	2860.78	2443.3	1.17087	1.21811	2.6123
2020-04-17	54	133830	3380	2478.33	127762	3033.85	2454.98	1.2358	1.28568	173.075
2020-04-18	55	137439	3609	2498.89	130988	3225.57	2469.61	1.3061	1.35879	191.717
2020-04-19	56	139897	2458	2498.16	133958	2969.71	2479.13	1.19788	1.24417	-255.856
2020-04-20	57	141672	1775	2485.47	136529	2571.47	2481.24	1.03636	1.07427	-398.237
2020-04-21	58	143457	1785	2473.4	138838	2309.32	2478.63	0.931691	0.964425	-262.158
2020-04-22	59	145694	2237	2469.39	141124	2285.21	2475.55	0.923113	0.955021	-24.1054
2020-04-23	60	148046	2352	2467.43	143431	2307.47	2472.84	0.933126	0.964979	22.2631
2020-04-24	61	150383	2337	2465.3	145748	2317.32	2470.33	0.93806	0.969624	9.84206
2020-04-25	62	152438	2055	2458.68	147978	2229.88	2466.44	0.904086	0.933776	-87.4386
2020-04-26	63	154175	1737	2447.22	150044	2065.58	2460.04	0.839656	0.866372	-164.292
2020-04-27	64	155193	1018	2424.89	151760	1716.39	2448.32	0.701048	0.722262	-349.195
2020-04-28	65	156337	1144	2405.18	153286	1525.59	2433.94	0.626799	0.645154	-190.797
2020-04-29	66	157641	1304	2388.5	154738	1451.73	2418.79	0.600187	0.617409	-73.8644
2020-04-30	67	159119	1478	2374.91	156198	1460.49	2404.17	0.607481	0.62471	8.75705
2020-05-01	68	160758	1639	2364.09	157718	1519.99	2390.81	0.635765	0.653674	59.5047
2020-05-02	69	161703	945	2343.52	159046	1328.33	2375.05	0.559285	0.574499	-191.664
2020-05-03	70	162496	793	2321.37	160196	1149.88	2357.15	0.487828	0.500666	-178.442
2020-05-04	71	163175	679	2298.24	161189	992.923	2337.52	0.424777	0.435621	-156.962
2020-05-05	72	163860	685	2275.83	162079	890.282	2316.96	0.384247	0.393822	-102.641
2020-05-06	73	164807	947	2257.63	162989	909.188	2297.18	0.395784	0.405553	18.906
2020-05-07	74	166091	1284	2244.47	164023	1034.13	2279.61	0.453641	0.464866	124.937
2020-05-08	75	167300	1209	2230.67	165115	1092.42	2263.3	0.482666	0.494535	58.2915
2020-05-09	76	168551	1251	2217.78	166260	1145.28	2248.12	0.509437	0.521876	52.861
2020-05-10	77	169218	667	2197.64	167246	985.852	2231.29	0.44183	0.452271	-159.426
2020-05-11	78	169575	357	2174.04	168023	776.235	2212.21	0.350887	0.358865	-209.617
2020-05-12	79	170508	933	2158.33	168851	828.49	2194.25	0.377573	0.386118	52.2551
2020-05-13	80	171306	798	2141.32	169669	818.327	2176.61	0.375964	0.384361	-10.1633
2020-05-14	81	172239	933	2126.41	170526	856.551	2159.87	0.396574	0.405369	38.2245
2020-05-15	82	173152	913	2111.61	171401	875.367	2143.79	0.408328	0.417296	18.8163
2020-05-16	83	173772	620	2093.64	172192	790.245	2127.07	0.371518	0.379491	-85.1224
2020-05-17	84	174355	583	2075.65	172913	721.163	2109.93	0.341795	0.348979	-69.0816
2020-05-18	85	174697	342	2055.26	173507	594.776	2091.71	0.284349	0.290159	-126.388
2020-05-19	86	175210	513	2037.33	174075	567.517	2073.58	0.273689	0.279201	-27.2585
2020-05-20	87	176007	797	2023.07	174719	644.011	2056.74	0.313122	0.319426	76.4943
2020-05-21	88	176752	745	2008.55	175397	677.674	2040.68	0.332083	0.338725	33.6629
2020-05-22	89	177212	460	1991.15	176002	605.116	2024.17	0.298946	0.304798	-72.5581
2020-05-23	90	177850	638	1976.11	176618	616.077	2008.15	0.306789	0.312739	10.9613
2020-05-24	91	178281	431	1959.13	177172	554.385	1991.81	0.278332	0.283625	-61.6925
2020-05-25	92	178570	289	1940.98	177638	465.923	1974.87	0.235927	0.240309	-88.4617
2020-05-26	93	179002	432	1924.75	178093	454.616	1958.16	0.232164	0.236426	-11.3078
2020-05-27	94	179364	362	1908.13	178517	423.744	1941.48	0.218258	0.222204	-30.8718
2020-05-28	95	179717	353	1891.76	178917	400.162	1924.91	0.207887	0.211594	-23.5812
2020-05-29	96	180458	741	1879.77	179430	513.775	1909.86	0.269012	0.273843	113.613
2020-05-30	97	181196	738	1868	180019	588.517	1895.91	0.310414	0.315994	74.7417
2020-05-31	98	181482	286	1851.86	180507	487.678	1881.22	0.259234	0.263774	-100.839
2020-06-01	99	181815	333	1836.52	180943	436.119	1866.32	0.233678	0.237697	-51.5593
2020-06-02	100	182028	213	1820.28	181305	361.746	1850.97	0.195435	0.198724	-74.3728
2020-06-03	101	182370	342	1805.64	181660	355.164	1835.86	0.193459	0.19668	-6.58189
2020-06-04	102	182764	394	1791.8	182028	368.109	1821.18	0.202127	0.205468	12.9454
2020-06-05	103	183271	507	1779.33	182442	414.406	1807.23	0.229305	0.233087	46.2969
2020-06-06	104	183678	407	1766.13	182854	411.937	1793.53	0.22968	0.23343	-2.46871
2020-06-07	105	183979	301	1752.18	183229	374.958	1779.75	0.210681	0.214067	-36.9791
2020-06-08	106	184193	214	1737.67	183550	321.306	1765.72	0.181968	0.18484	-53.6528
2020-06-09	107	184543	350	1724.7	183881	330.87	1752.05	0.188848	0.191805	9.56483
2020-06-10	108	184861	318	1711.68	184208	326.58	1738.59	0.187842	0.190755	-4.29012
2020-06-11	109	185416	555	1701.06	184611	402.72	1726.08	0.233315	0.236947	76.1399
2020-06-12	110	185674	258	1687.95	184965	354.48	1713.37	0.206891	0.210055	-48.2401
2020-06-13	111	186022	348	1675.87	185317	352.32	1700.87	0.207141	0.210279	-2.16003
2020-06-14	112	186269	247	1663.12	185635	317.213	1688.29	0.187891	0.190695	-35.1067
2020-06-15	113	186461	192	1650.1	185910	275.476	1675.56	0.164408	0.166823	-41.7378
2020-06-16	114	186839	378	1638.94	186220	309.65	1663.35	0.186161	0.188887	34.1748
2020-06-17	115	187184	345	1627.69	186541	321.434	1651.46	0.194636	0.197468	11.7832
2020-06-18	116	187764	580	1618.66	186949	407.622	1640.53	0.24847	0.252111	86.1888
2020-06-19	117	188534	770	1611.4	187477	528.415	1630.82	0.324018	0.328825	120.793
2020-06-20	118	189135	601	1602.84	188030	552.61	1621.49	0.340803	0.345835	24.195
2020-06-21	119	189822	687	1595.14	188627	597.407	1612.71	0.370437	0.3759	44.7967
2020-06-22	120	190359	537	1586.33	189204	577.271	1603.91	0.359914	0.365157	-20.1355
2020-06-23	121	190862	503	1577.37	189757	552.514	1595.07	0.346389	0.351371	-24.757
2020-06-24	122	191449	587	1569.25	190321	564.009	1586.46	0.355514	0.360595	11.4953
2020-06-25	123	192079	630	1561.62	190907	586.006	1578.18	0.371318	0.376603	21.9969
2020-06-26	124	192556	477	1552.87	191457	549.671	1569.74	0.350166	0.355077	-36.3354
2020-06-27	125	193243	687	1545.94	192052	595.447	1561.81	0.381254	0.386605	45.7764
2020-06-28	126	193499	256	1535.71	192534	482.298	1553.11	0.310537	0.314771	-113.149
2020-06-29	127	193761	262	1525.68	192943	408.865	1543.97	0.264815	0.26835	-73.4327
2020-06-30	128	194259	498	1517.65	193382	438.577	1535.19	0.285682	0.28949	29.7115
The omega of EMA		0.333333
Mean			1517.65	1570.79		1559.36	1596.54	1.47852	1.66712
Standard Deviation			1707.53	830.023		1637.15	812.75	1.52016	1.76137
Coefficent of Variation % (=STDev/Mean)			1.12511	0.528412		1.04989	0.509071	1.02816	1.05653
